# Supplementary material for: Hypoxia-induced circular RNA hsa_circ_0008450 accelerates hepatocellular cancer progression via the miR-431/AKAP1 axis
Source: PubMed Central journal article supplement — Oncol Lett. 2020 Oct 29;20(6):388. doi: 10.3892/ol.2020.12251 (PMC7656113; doi:10.3892/ol.2020.12251), 2020-10-29

Figure S1. Expression level of HIF-1 $\alpha$  in HCC. The expression of HIF-1 $\alpha$  in HCC tissues and adjacent normal HCC tissues was examined with reverse transcription-quantitative PCR. \*P<0.05. HIF-1 $\alpha$ , hypoxia-inducible factor-1 $\alpha$ ; HCC, hepatocellular cancer.

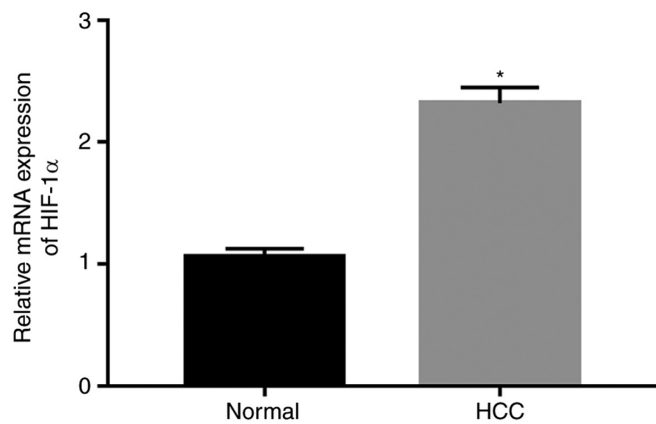

Figure S2. Reverse transcription-quantitative PCR with divergent or convergent primers revealed the existence of circ\_0008450 in SNU-387 cells. circ, circular; cDNA, complementary DNA; gDNA, genomic DNA.

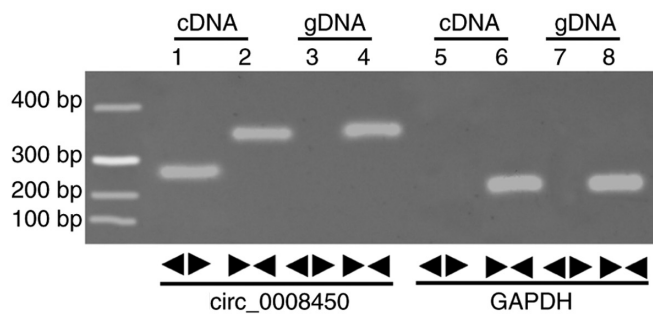

Figure S3. Effect of circ\_0008450 inhibition on the apoptosis and glycolysis of THLE-2 cells under hypoxia conditions. THLE-2 cells were transfected with si-NC or si-circ\_0008450. (A) Flow cytometry assays were performed to assess the apoptosis of THLE-2 cells under normoxic or hypoxic conditions. Glycolysis assays were conducted to evaluate (B) glucose consumption and (C) lactate production in THLE-2 cells under normoxic or hypoxic conditions. circ, circular; si-, small interfering; NC, negative control; N, normoxic; H, hypoxic.

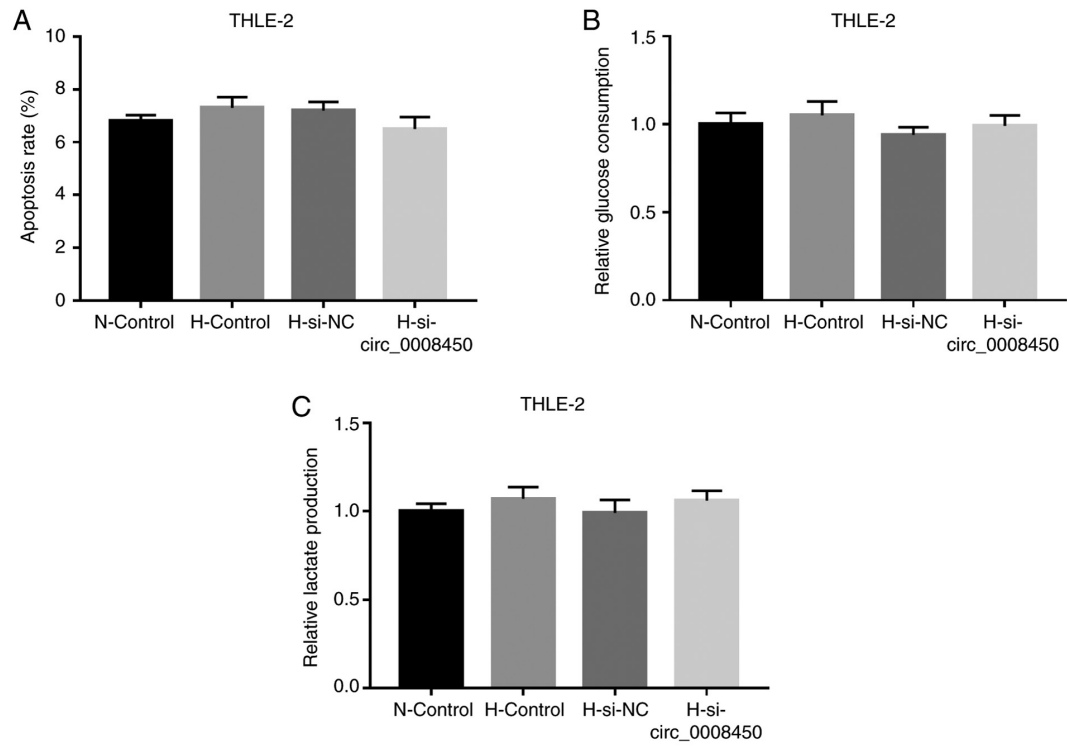

Figure S4. Effect of circ\_0008450 inhibition on the levels of caspase-3 of hepatocellular cancer cells under hypoxia. The levels of caspase-3 in hypoxia-treated SNU-387 and Huh7 cells following si-NC or si-circ\_0008450 transfection were detected by western blotting. \*P<0.05. circ, circular; si-, small interfering; NC, negative control; N, normoxic; H, hypoxic; caspase-3, cleaved caspase-3.

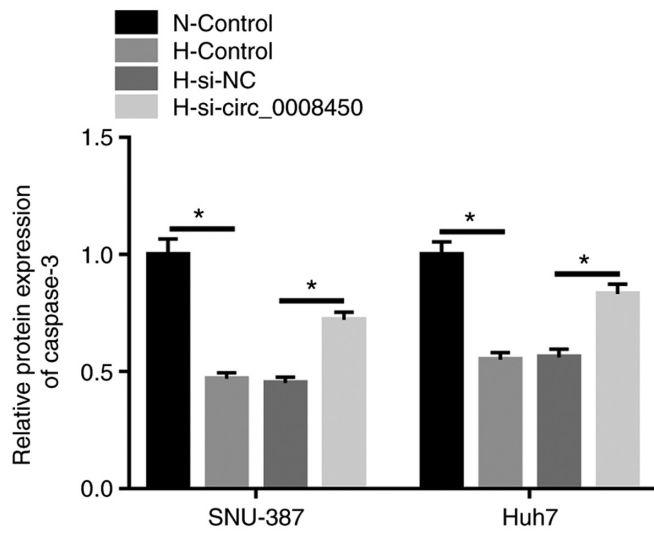

Figure S5. Transfection efficiency of the SNU-237 and Huh7 cells with circ\_0008450 and pc-AKAP1. The expression of circ\_0008450 and AKAP1 mRNA in SNU-387 and Huh7 cells transfected with (A) circ\_0008450, vector, (B) pc-NC or pc-AKAP1 were detected by reverse transcription-quantitative PCR. \*P<0.05. circ, circular; AKAP1, A-kinase anchor protein 1; pc, pcDNA; NC, negative control.

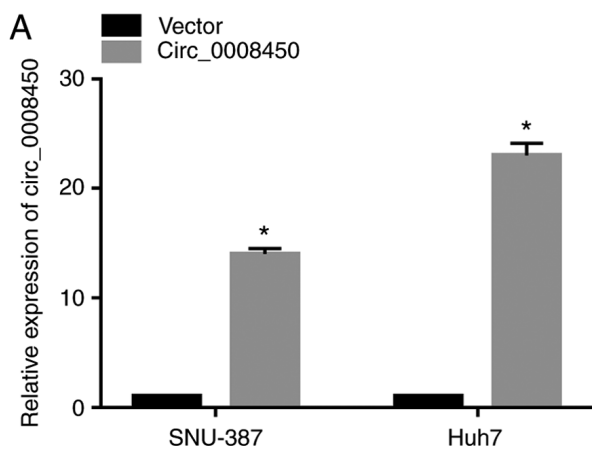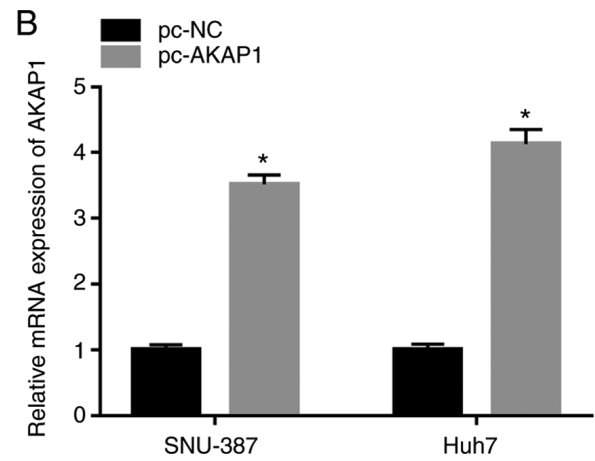

Figure S6. Transfection efficiency of the SNU-237 and Huh7 cells with sh-circ\_0008450. Expression of circ\_0008450 in Huh7 cells transfected with sh-circ\_0008450 or sh-NC was examined by reverse transcription-quantitative PCR. \*P<0.05. sh, short hairpin; circ, circular.

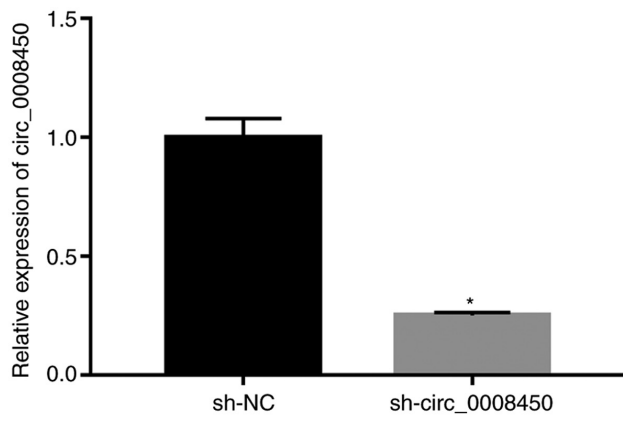

Figure S7. Levels of caspase-3 in xenograft tissues. The levels of caspase-3 in tumor tissues of the sh-circ\_0008450 or sh-NC groups were measured by western blotting. \*P<0.05. sh, short hairpin; NC, negative control.

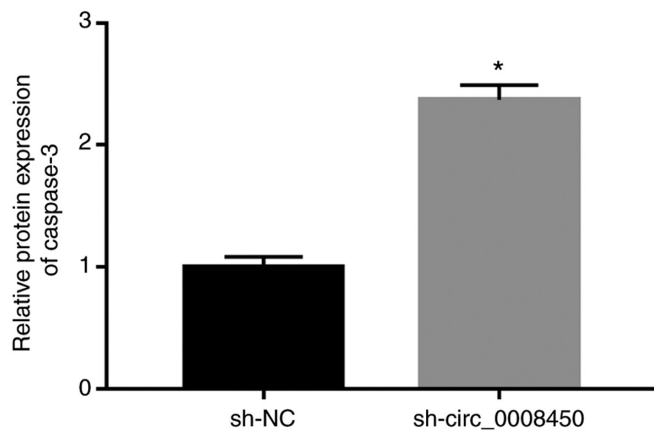

Supplement: Supplementary_Data.pdf [file Supplementary_Data.pdf]
